# Supplementary material
Source: Research Square preprint supplement (doi:10.21203/rs.3.rs-8886587/v1)
Supplement: Supplementary file 1 [file 14ba3e2129e1c0cdad7a68a3.xlsx]

## Sheet: Sayfa1
Item No	Item	F1	F2	F3	F4	F5
7	I witness or believe that my colleagues or supervisors make negative statements about my professional competence to patients
8	During shift handovers, my colleagues fail to provide me with sufficient information		0.44
9	Intensive shifts or duties are always assigned to me
10	I believe that I am subjected to mobbing (workplace bullying)		0.52			0.41
11	I witness mobbing being applied to others
12	I am scolded loudly at work		0.74
13	I am frequently interrupted while speaking at work		0.71
14	I am prevented from communicating with others at work		0.63
15	I am disturbed by colleagues through gestures, facial expressions, or looks		0.60
16	My decisions are constantly questioned		0.58
17	My work performance is obstructed	0.47
18	I am subjected to financial burdens due to damage related to work or my supervisor’s personal matters
19	I am put in humiliating situations at work		0.66
20	My colleagues behave as if I do not exist			0.72
21	I have hostile relationships with my colleagues			0.54
22	I believe my colleagues are boycotting me			0.68
23	I receive written and/or verbal threats from colleagues				0.62
24	I feel that I am the target of degrading remarks at work		0.78
25	I experience problems due to my ethnic identity
26	I feel anxious while working
27	I feel that I am being monitored by my colleagues			0.45
28	I believe my colleagues gossip about me					0.72
29	I am blamed for negative events by colleagues
30	I remain alone during breaks			0.70
31	I feel that no one listens to me		0.69
32	I am subjected to physical violence at work				0.75
33	I am subjected to swearing or insulting language directed at me		0.59
34	I believe I have been subjected to verbal, non-verbal, or physical sexual harassment
35	I am exposed to sexually explicit crude jokes
36	My physical appearance is mocked				0.44
37	My political views become the focus of criticism				0.41
38	My colleagues damage my personal belongings				0.58
39	My colleagues make unnecessary criticisms about my private life
40	My colleagues criticize my religious beliefs
41	I am harassed through communication tools (phone, messaging, email) by colleagues
43	Tasks assigned to me are taken back without explanation
44	I am asked to perform tasks that I cannot understand the purpose of	0.76
45	The tasks assigned to me are constantly changed	0.74
46	I am assigned simple tasks that do not require professional expertise	0.81
47	I am assigned tasks that are not appropriate for my field of expertise	0.84
48	I am assigned tasks that are not appropriate for my level of remuneration	0.79
49	I am required to work on unnecessary tasks	0.82
50	I am assigned tasks that are physically too demanding for me	0.68
51	I am forced to perform degrading tasks	0.77
52	I am excluded from beneficial professional activities in the workplace	0.55
53	The tools and equipment I use for work are removed without informing me	0.49
54	I believe my career development is deliberately obstructed	0.52
55	I am pressured to seek psychological help				0.65
56	Others believe that I am a psychologically ill person				0.48
