# Supplementary material
Source: Research Square preprint supplement (doi:10.21203/rs.3.rs-8886587/v1)
Supplement: Supplementary file 2 [file 24cff721707aadd681c19908.xlsx]

## Sheet: Sheet1
Domain	Overall %	Intern %	Resident %
Work overload and role misuse	45.2	66.1	23.9
Communication-related humiliation and reputational attacks	30.3	43.8	16.5
Social exclusion and isolation	3.6	5.4	1.8
Threats, violence, and stigmatization	2.3	3.6	0.9
