# Supplementary material
Source: Research Square preprint supplement (doi:10.21203/rs.3.rs-8886587/v1)
Supplement: Supplementary file 3 [file 580a9d217f7ac0772ebfe6db.xlsx]

## Sheet: Sayfa1
Item no	Item	Intern n (%)	Resident n (%)	Risk Diff (pp)	p-value
1	I like my profession	88 (78.6)	85 (78.0)	+0.6	1000
2	I believe my profession receives the respect it deserves in society	18 (16.1)	25 (22.9)	-6.9	0.263
3	I consider my profession suitable for me	86 (76.8)	81 (74.3)	+2.5	0.786
4	I find the resources provided in my working environment sufficient	20 (17.9)	28 (25.7)	-7.8	0.212
5	I consider myself well-aligned with my colleagues	94 (83.9)	96 (88.1)	-4.1	0.488
6	I am informed in a timely manner about decisions made in my department	53 (47.3)	76 (69.7)	-22.4	0.001
7	I witness or believe that my colleagues or supervisors make negative statements about my professional competence to patients	18 (16.1)	2 (1.8)	+14.2	<0.001
8	During shift handovers, my colleagues fail to provide me with sufficient information	78 (69.6)	83 (76.1)	-6.5	0.349
9	Intensive shifts or duties are always assigned to me	10 (8.9)	15 (13.8)	-4.8	0.357
10	I believe that I am subjected to mobbing (workplace bullying)	50 (44.6)	12 (11.0)	+33.6	<0.001
11	I witness mobbing being applied to others	67 (59.8)	20 (18.3)	+41.5	<0.001
12	I am scolded loudly at work	20 (17.9)	1 (0.9)	+16.9	<0.001
13	I am frequently interrupted while speaking at work	22 (19.6)	4 (3.7)	+16.0	<0.001
14	I am prevented from communicating with others at work	12 (10.7)	2 (1.8)	+8.9	0.011
15	I am disturbed by colleagues through gestures, facial expressions, or looks	9 (8.0)	2 (1.8)	+6.2	0.059
16	My decisions are constantly questioned	13 (11.6)	7 (6.4)	+5.2	0.268
17	My work performance is obstructed	16 (14.3)	3 (2.8)	+11.5	0.003
18	I am subjected to financial burdens due to damage related to work or my supervisor’s personal matters	9 (8.0)	0 (0.0)	+8.0	0.003
19	I am put in humiliating situations at work	8 (7.1)	0 (0.0)	+7.1	0.007
20	My colleagues behave as if I do not exist	9 (8.0)	1 (0.9)	+7.1	0.019
21	I have hostile relationships with my colleagues	5 (4.5)	2 (1.8)	+2.6	0.446
22	I believe my colleagues are boycotting me	1 (0.9)	2 (1.8)	-0.9	0.618
23	I receive written and/or verbal threats from colleagues	5 (4.5)	1 (0.9)	+3.5	0.213
24	I feel that I am the target of degrading remarks at work	4 (3.6)	1 (0.9)	+2.7	0.370
25	I experience problems due to my ethnic identity	3 (2.7)	1 (0.9)	+1.8	0.622
26	I feel anxious while working	26 (23.2)	13 (11.9)	+11.3	0.043
27	I feel that I am being monitored by my colleagues	11 (9.8)	4 (3.7)	+6.2	0.106
28	I believe my colleagues gossip about me	7 (6.2)	17 (15.6)	-9.3	0.044
29	I am blamed for negative events by colleagues	4 (3.6)	4 (3.7)	-0.1	1000
30	I remain alone during breaks	2 (1.8)	4 (3.7)	-1.9	0.441
31	I feel that no one listens to me	3 (2.7)	2 (1.8)	+0.8	1000
32	I am subjected to physical violence at work	2 (1.8)	0 (0.0)	+1.8	0.498
33		5 (4.5)	0 (0.0)	+4.5	0.060
	I am subjected to swearing or insulting language directed at me
34	I believe I have been subjected to verbal, non-verbal, or physical sexual harassment	2 (1.8)	1 (0.9)	+0.9	1000
35	I am exposed to sexually explicit crude jokes	6 (5.4)	6 (5.5)	-0.1	1000
36	My physical appearance is mocked	2 (1.8)	1 (0.9)	+0.9	1000
37	My political views become the focus of criticism	3 (2.7)	4 (3.7)	-1.0	0.719
38	My colleagues damage my personal belongings	2 (1.8)	0 (0.0)	+1.8	0.498
39	My colleagues make unnecessary criticisms about my private life	7 (6.2)	1 (0.9)	+5.3	0.066
40	My colleagues criticize my religious beliefs	5 (4.5)	2 (1.8)	+2.6	0.446
41	I am harassed through communication tools (phone, messaging, email) by colleagues	12 (10.7)	2 (1.8)	+8.9	0.011
42	I prioritize my job above everything else because I believe nothing is more important than work	20 (17.9)	15 (13.8)	+4.1	0.516
43	Tasks assigned to me are taken back without explanation	6 (5.4)	1 (0.9)	+4.4	0.119
44	I am asked to perform tasks that I cannot understand the purpose of	47 (42.0)	19 (17.4)	+24.5	<0.001
45	The tasks assigned to me are constantly changed	29 (25.9)	7 (6.4)	+19.5	<0.001
46	I am assigned simple tasks that do not require professional expertise	55 (49.1)	12 (11.0)	+38.1	<0.001
47	I am assigned tasks that are not appropriate for my field of expertise	58 (51.8)	11 (10.1)	+41.7	<0.001
48	I am assigned tasks that are not appropriate for my level of remuneration	73 (65.2)	18 (16.5)	+48.7	<0.001
49	I am required to work on unnecessary tasks	71 (63.4)	19 (17.4)	+46.0	<0.001
50	I am assigned tasks that are physically too demanding for me	38 (33.9)	9 (8.3)	+25.7	<0.001
51	I am forced to perform degrading tasks	31 (27.7)	3 (2.8)	+24.9	<0.001
52	I am excluded from beneficial professional activities in the workplace	23 (20.5)	6 (5.5)	+15.0	0.002
53	The tools and equipment I use for work are removed without informing me	14 (12.5)	3 (2.8)	+9.7	0.010
54	I believe my career development is deliberately obstructed	17 (15.2)	7 (6.4)	+8.8	0.061
55	I am pressured to seek psychological help	2 (1.8)	1 (0.9)	+0.9	1000
56	Others believe that I am a psychologically ill person	2 (1.8)	3 (2.8)	-1.0	0.680
