# Supplementary material
Source: Research Square preprint supplement (doi:10.21203/rs.3.rs-8886587/v1)
Supplement: Supplementary file 4 [file 67c7017700509603e1b8b81b.xlsx]

## Sheet: Sayfa1
Reported primary source of mistreatment (Item 57)	n	%
Multiple units	78	70.3
Surgical Departments: Faculty members and research assistants (residents)	19	17.1
Internal Medicine Departments: Faculty members and research assistants (residents)	6	5.4
Nursing services	6	5.4
Secretarial services / Front-desk administrative staff	2	1.8
Basic Medical Sciences: Faculty members and research assistants (residents)	0	0
