# Supplementary material
Source: Research Square preprint supplement (doi:10.21203/rs.3.rs-8886587/v1)
Supplement: Supplementary file 5 [file 967c1f60c11a0509c57b3b75.xlsx]

## Sheet: Sayfa1
Item	Intern physicians (n=112) n (%)	Residents (n=109) n (%)	Risk Difference (pp)	p-value
1. I love my profession	88 (78.6%)	85 (78.0%)	+0.6	1000
2. I believe my profession receives the respect it deserves	18 (16.1%)	25 (22.9%)	-6.9	0.263
3. I consider my profession suitable for me	86 (76.8%)	81 (74.3%)	+2.5	0.786
4. I find the opportunities provided in my workplace adequate	20 (17.9%)	28 (25.7%)	-7.8	0.212
5. I perceive myself as compatible with my colleagues	94 (83.9%)	96 (88.1%)	-4.1	0.488
6. I am informed in a timely manner about decisions taken in my department	53 (47.3%)	76 (69.7%)	-22.4	0.001
42. My job comes before everything else	20 (17.9%)	15 (13.8%)	+4.1	0.516
