# Supplementary material
Source: Research Square preprint supplement (doi:10.21203/rs.3.rs-8886587/v1)
Supplement: Supplementary file 6 [file c3535c37927f90675b07ac8b.xlsx]

## Sheet: Sayfa1
Variable	Adjusted OR	95% CI	p-value
Professional role (Intern vs Resident)	5.22	1.09–25.02	0.039
Gender (Female vs Male)	0.75	0.20–2.80	0.673
Psychiatric history (Yes vs No)	0.73	0.20–2.70	0.638
