# Supplementary material
Source: Research Square preprint supplement (doi:10.21203/rs.3.rs-8886587/v1)
Supplement: Supplementary file 7 [file c7520fd6c2d7d0c73a1f244f.xlsx]

## Sheet: Sayfa1
Variable	Adjusted OR	95% CI	p-value
Professional role (Intern vs Resident)	5.58	2.87–10.84	<0.001
Gender (Female vs Male)	0.70	0.37–1.36	0.294
Psychiatric history (Yes vs No)	1.31	0.67–2.56	0.435
