# Supplementary material
Source: Research Square preprint supplement (doi:10.21203/rs.3.rs-8886587/v1)
Supplement: Supplementary file 8 [file d48157997e07f28cf187cd5d.xlsx]

## Sheet: Table S5
Domain	Adjusted OR (Intern vs Resident)	95% CI	p-value
Work overload and role misuse (Factor 1)	6.27	3.45–11.40	<0.001
Communication-related humiliation / reputational attacks (Factor 2 + Item 28)	4.00	2.12–7.57	<0.001
Social exclusion (Factor 3)	3.75	0.72–19.51	Sparse/unstable*
Threats / violence / stigma (Factor 4)	—	—	Not reported (sparse data)*

## Sheet: Note
Note
*Very low event counts in Factor 3–4 yield wide CIs and unstable maximum-likelihood estimates; Factor 4 model not reported as inferential.
